# Supplementary material for: Multi-omics analysis identifies mitochondrial pathways associated with anxiety-related behavior
Source: PLoS Genet. 2019 Sep 26;15(9):e1008358. doi: 10.1371/journal.pgen.1008358 (PMC6762065; doi:10.1371/journal.pgen.1008358)
Supplement: S1 Table — All analyses performed with SPSS Statistics 25. B6: C57BL/6NCrl; D2: DBA/2NCrl; SA: social avoidance. (XLSX) [file pgen.1008358.s005.xlsx]

## Sheet: S1 Table
S1 Table. The effect of chronic social defeat stress on behavior of B6 and D2 mice. All analyses performed with SPSS Statistics 25. B6: C57BL/6NCrl; D2: DBA/2NCrl; SA: social avoidance.
Time in IZ (s) in the SA test	Mixed ANOVA (phenotype*trial), post hoccomparison of no-target and target trials
Strain	Phenotype	n	Mean difference	P
B6	Control	34	-24.099	8.98e-08
	Resilient	78	-33.209	2.03e-17
	Susceptible	56	13.401	0.00025
D2	Control	56	-36.613	2.33e-11
	Resilient	8	-17.586	0.003
	Susceptible	62	25.28	1.26e-11
Time in corners (s) in the SA test	Mixed ANOVA (phenotype*trial), post hoccomparison of no-target and target trials
Strain	Phenotype	n	Mean difference	P
B6	Control	34	3.791	0.332
	Resilient	78	4.96	0.21
	Susceptible	56	-23.81	0.001
D2	Control	56	20.834	5.37e-08
	Resilient	8	5.868	0.626
	Susceptible	62	-21.622	2.2e-05
Distance travelled (cm) in SA test (no-target trial)	One-way ANOVA (phenotype*trial), post hoc comparison of phenotypes
Strain	Comparison	n	Mean difference	P
B6	Control vs. resilient	34	193.112	1.8e-05
	Control vs. susceptible	78	156.963	0.003
	Resilient vs. susceptible	56	-36.149	0.443
D2	Control vs. resilient	56	-167.667	0.178
	Control vs. susceptible	8	207.494	0.002
	Resilient vs. susceptible	62	375.161	0.003
Latency to immobility (s) in the forced swim test (FST)	Pearson correlation between social interaction (SI) ratio and the latency to immobility in FST
Strain	Experimental condition	n	Correlation coefficient (r)	P
B6	Control	28	-0.079	0.691
	Defeated	53	0.026	0.852
D2	Control	8	-0.13	0.759
	Defeated	6	0.92	0.009
