# Supplementary material for: Multi-omics analysis identifies mitochondrial pathways associated with anxiety-related behavior
Source: PLoS Genet. 2019 Sep 26;15(9):e1008358. doi: 10.1371/journal.pgen.1008358 (PMC6762065; doi:10.1371/journal.pgen.1008358)
Supplement: S6 Table — Data generated from mouse BNST following exposure to chronic social defeat stress. All non-significant results (P > 0.05 and |FC| < 1.2) are indicated by a hyphen ("-"). B6: C57BL/6NCrl; D2: DBA/2NCrl; FC: fold change. (XLSX) [file pgen.1008358.s010.xlsx]

## Sheet: B6 strain
S6 Table. Overlap between statistically significant differentially expressed (P < 0.05 and |FC| ≥ 1.2) transcriptomic (data sets A and E) and proteomic (data set B) data. Data generated from mouse BNST following exposure to chronic social defeat stress. All non-significant results (P > 0.05 and |FC| < 1.2) are indicated by a hyphen ("-"). B6: C57BL/6NCrl; D2: DBA/2NCrl; FC: fold change.
Protein information (dataset B)		Gene information (dataset A and/or E)			Differentially expressed (DE) proteins (dataset B)									Differentially expressed (DE) genes (dataset A)									Differentially expressed (DE) target mRNAs (dataset E)
					Resilient versus Control			Susceptible versus Control			Susceptible versus Resilient			Resilient versus Control			Susceptible versus Control			Susceptible versus Resilient			Resilient versus Control			Susceptible versus Control			Susceptible versus Resilient
UniProt name	UniProtKB ID	Gene name	Ensembl ID	Description	logFC	P	PFDR	logFC	P	PFDR	logFC	P	PFDR	logFC	P	PFDR	logFC	P	PFDR	logFC	P	PFDR	logFC	P	PFDR	logFC	P	PFDR	logFC	P	PFDR
CALB2_MOUSE	Q08331	Calb2	ENSMUSG00000003657	CALBINDIN 2 [SOURCE:MGI SYMBOL;ACC:MGI:101914]	-0.486852	0.00831719	0.173552	-	-	-	-	-	-	-0.189208	0.779493	0.999926	-	-	-	-	-	-	-0.225871	0.576292	0.801438	-	-	-	-	-	-
CAMKV_MOUSE	Q3UHL1	Camkv	ENSMUSG00000032936	CAM KINASE-LIKE VESICLE-ASSOCIATED [SOURCE:MGI SYMBOL;ACC:MGI:2384296]	0.375018	0.00342938	0.100444	0.287549	0.037754	0.986567	-	-	-	0.171034	0.592922	0.999926	-0.159728	0.617104	0.952811	-	-	-	-0.0105533	0.954277	0.982562	-0.0143025	0.941141	0.972487	-	-	-
CLAP2_MOUSE	Q8BRT1	Clasp2	ENSMUSG00000033392	CLIP ASSOCIATING PROTEIN 2 [SOURCE:MGI SYMBOL;ACC:MGI:1923749]	-0.326128	0.0331924	0.451706	-	-	-	-	-	-	0.0224315	0.913129	0.999926	-	-	-	-	-	-	0.115588	0.141472	0.428842	-	-	-	-	-	-
CXA1_MOUSE	P23242	Gja1	ENSMUSG00000050953	GAP JUNCTION PROTEIN, ALPHA 1 [SOURCE:MGI SYMBOL;ACC:MGI:95713]	-0.441183	0.00288715	0.100444	-0.368514	0.0409699	0.986567	-	-	-	-0.00925737	0.946758	0.999926	0.253964	0.0752798	0.735575	-	-	-	-0.214178	0.0409501	0.242912	-0.274935	0.0150248	0.103953	-	-	-
GMFB_MOUSE	Q9CQI3	Gmfb	ENSMUSG00000062014	GLIA MATURATION FACTOR, BETA [SOURCE:MGI SYMBOL;ACC:MGI:1927133]	0.387209	0.00202753	0.100444	-	-	-	-	-	-	0.0549377	0.834543	0.999926	-	-	-	-	-	-	-0.0811952	0.324046	0.624112	-	-	-	-	-	-
GELS_MOUSE	P13020	Gsn	ENSMUSG00000026879	GELSOLIN [SOURCE:MGI SYMBOL;ACC:MGI:95851]	-0.407368	0.00353	0.100444	-0.664319	0.000868334	0.263105	-	-	-	-0.013126	0.968509	0.999926	0.363282	0.276343	0.880188	-	-	-	0.0325075	0.810782	0.92146	0.144105	0.30226	0.541353	-	-	-
ITPR1_MOUSE	P11881	Itpr1	ENSMUSG00000030102	INOSITOL 1,4,5-TRISPHOSPHATE RECEPTOR 1 [SOURCE:MGI SYMBOL;ACC:MGI:96623]	0.452572	0.00336246	0.100444	-	-	-	-	-	-	0.102924	0.571211	0.999926	-	-	-	-	-	-	-0.200676	0.310983	0.613175	-	-	-	-	-	-
PC4L1_MOUSE	Q6W8Q3	Pcp4l1	ENSMUSG00000038370	PURKINJE CELL PROTEIN 4-LIKE 1 [SOURCE:MGI SYMBOL;ACC:MGI:1913675]	0.372368	0.00711526	0.159077	-	-	-	-	-	-	0.119284	0.692526	0.999926	-	-	-	-	-	-	-0.471721	0.00142574	0.0574082	-	-	-	-	-	-
PCSK1_MOUSE	Q9QXV0	Pcsk1n	ENSMUSG00000039278	PROPROTEIN CONVERTASE SUBTILISIN/KEXIN TYPE 1 INHIBITOR [SOURCE:MGI SYMBOL;ACC:MGI:1353431]	-0.748601	<0.001	0.0301804	-0.686913	0.0120029	0.986567	-	-	-	0.188314	0.729051	0.999926	0.241796	0.656381	0.958054	-	-	-	-0.978146	0.00852062	0.12622	-0.982565	0.00950311	0.0808643	-	-	-
PDE1B_MOUSE	Q01065	Pde1b	ENSMUSG00000022489	PHOSPHODIESTERASE 1B, CA2+-CALMODULIN DEPENDENT [SOURCE:MGI SYMBOL;ACC:MGI:97523]	0.308982	0.0116738	0.201105	-	-	-	-	-	-	0.119184	0.665114	0.999926	-	-	-	-	-	-	-0.0123526	0.957811	0.983367	-	-	-	-	-	-
MYPR_MOUSE	P60201	Plp1	ENSMUSG00000031425	PROTEOLIPID PROTEIN (MYELIN) 1 [SOURCE:MGI SYMBOL;ACC:MGI:97623]	-0.332235	0.0120726	0.201105	-0.302004	0.0368498	0.986567	-	-	-	0.100448	0.759535	0.999926	0.905903	0.0104812	0.630395	-	-	-	-0.525176	0.0720142	0.316165	-1.11903	0.00125256	0.0302022	-	-	-
PPR1B_MOUSE	Q60829	Ppp1r1b	ENSMUSG00000061718	PROTEIN PHOSPHATASE 1, REGULATORY (INHIBITOR) SUBUNIT 1B [SOURCE:MGI SYMBOL;ACC:MGI:94860]	0.409799	0.00290699	0.100444	-	-	-	-0.263804	0.0107217	0.652048	0.209323	0.669474	0.999926	-	-	-	-0.206544	0.673623	0.945026	-0.346476	0.275376	0.579072	-	-	-	-0.193107	0.563273	0.999653
PP2BA_MOUSE	P63328	Ppp3ca	ENSMUSG00000028161	PROTEIN PHOSPHATASE 3, CATALYTIC SUBUNIT, ALPHA ISOFORM [SOURCE:MGI SYMBOL;ACC:MGI:107164]	0.2748	0.0230997	0.328646	-	-	-	-	-	-	0.246175	0.32361	0.999926	-	-	-	-	-	-	-0.452283	0.0150837	0.156939	-	-	-	-	-	-
SCG2_MOUSE	Q03517	Scg2	ENSMUSG00000050711	SECRETOGRANIN II [SOURCE:MGI SYMBOL;ACC:MGI:103033]	-0.775836	<0.001	0.0112808	-0.558787	0.0204313	0.986567	-	-	-	0.228371	0.234565	0.999926	0.308988	0.11164	0.784548	-	-	-	-0.248529	0.105852	0.377132	-0.162564	0.295341	0.53435	-	-	-
SH3G2_MOUSE	Q62420	Sh3gl2	ENSMUSG00000028488	SH3-DOMAIN GRB2-LIKE 2 [SOURCE:MGI SYMBOL;ACC:MGI:700009]	0.544322	0.000605123	0.0473509	-	-	-	-	-	-	0.139665	0.42898	0.999926	-	-	-	-	-	-	-0.304824	0.0104783	0.13745	-	-	-	-	-	-
S6A11_MOUSE	P31650	Slc6a11	ENSMUSG00000030307	SOLUTE CARRIER FAMILY 6 (NEUROTRANSMITTER TRANSPORTER, GABA), MEMBER 11 [SOURCE:MGI SYMBOL;ACC:MGI:95630]	-0.475799	0.00252815	0.100444	-	-	-	-	-	-	-0.328078	0.309663	0.999926	-	-	-	-	-	-	-0.142112	0.20899	0.508309	-	-	-	-	-	-
NSMA2_MOUSE	Q9JJY3	Smpd3	ENSMUSG00000031906	SPHINGOMYELIN PHOSPHODIESTERASE 3, NEUTRAL [SOURCE:MGI SYMBOL;ACC:MGI:1927578]	0.289091	0.0374336	0.457803	-	-	-	-	-	-	-0.0059505	0.985714	0.999926	-	-	-	-	-	-	-0.412214	0.156018	0.449208	-	-	-	-	-	-
TY3H_MOUSE	P24529	Th	ENSMUSG00000000214	TYROSINE HYDROXYLASE [SOURCE:MGI SYMBOL;ACC:MGI:98735]	0.575806	<0.001	0.0112808	0.296537	0.0488564	0.986567	-0.279268	0.00714246	0.652048	0.00372689	0.991084	0.999926	-0.172213	0.611083	0.95263	-0.17594	0.609147	0.929681	0.26363	0.510957	0.763114	0.306113	0.446487	0.67209	0.0424827	0.914208	0.999653
VGLU1_MOUSE	Q3TXX4	Slc17a7	ENSMUSG00000070570	SOLUTE CARRIER FAMILY 17 (SODIUM-DEPENDENT INORGANIC PHOSPHATE COTRANSPORTER), MEMBER 7 [SOURCE:MGI SYMBOL;ACC:MGI:1920211]	0.278858	0.0117899	0.201105	-	-	-	-	-	-	1.38197	0.27584	0.999926	-	-	-	-	-	-	0.287242	0.294503	0.598217	-	-	-	-	-	-
SYGP1_MOUSE	F6SEU4	Syngap1	ENSMUSG00000067629	SYNAPTIC RAS GTPASE ACTIVATING PROTEIN 1 HOMOLOG (RAT) [SOURCE:MGI SYMBOL;ACC:MGI:3039785]	0.32172	0.0122077	0.201105	-	-	-	-	-	-	0.222888	0.549839	0.999926	-	-	-	-	-	-	-0.144019	0.166781	0.459785	-	-	-	-	-	-
NECA2_MOUSE	Q91ZP9	Necab2	ENSMUSG00000031837	N-TERMINAL EF-HAND CALCIUM BINDING PROTEIN 2 [SOURCE:MGI SYMBOL;ACC:MGI:2152211]	0.331182	0.00574202	0.13825	-	-	-	-0.352884	0.0112311	0.652048	-0.0576965	0.812055	0.999926	-	-	-	-0.0740723	0.760576	0.960678	-0.0776571	0.702463	0.87071	-	-	-	-0.0786622	0.713148	0.999653
CLD11_MOUSE	Q60771	Cldn11	ENSMUSG00000037625	CLAUDIN 11 [SOURCE:MGI SYMBOL;ACC:MGI:106925]	-0.26389	0.0133705	0.209248	-	-	-	-	-	-	0.0260425	0.922463	0.999926	-	-	-	-	-	-	-0.374958	0.00224817	0.0697461	-	-	-	-	-	-
KAP3_MOUSE	P31324	Prkar2b	ENSMUSG00000002997	PROTEIN KINASE, CAMP DEPENDENT REGULATORY, TYPE II BETA [SOURCE:MGI SYMBOL;ACC:MGI:97760]	0.366439	0.00391657	0.102157	-	-	-	-	-	-	0.0833996	0.69421	0.999926	-	-	-	-	-	-	-0.250559	0.157259	0.450363	-	-	-	-	-	-
ACBP_MOUSE	P31786	Dbi	ENSMUSG00000026385	DIAZEPAM BINDING INHIBITOR [SOURCE:MGI SYMBOL;ACC:MGI:94865]	-	-	-	-0.425558	0.0211555	0.986567	-	-	-	-	-	-	0.562668	0.000881089	0.480159	-	-	-	-	-	-	-0.182694	0.115798	0.317853	-	-	-
AT2B1_MOUSE	G5E829	Atp2b1	ENSMUSG00000019943	ATPASE, CA++ TRANSPORTING, PLASMA MEMBRANE 1 [SOURCE:MGI SYMBOL;ACC:MGI:104653]	-	-	-	0.311064	0.0306119	0.986567	-	-	-	-	-	-	0.302155	0.127337	0.800724	-	-	-	-	-	-	-0.273918	0.0134137	0.0971688	-	-	-
DCE2_MOUSE	P48320	Gad2	ENSMUSG00000026787	GLUTAMIC ACID DECARBOXYLASE 2 [SOURCE:MGI SYMBOL;ACC:MGI:95634]	-	-	-	-	-	-	-0.292833	0.0376029	0.839577	-	-	-	-	-	-	0.295111	0.0813671	0.651834	-	-	-	-	-	-	0.0268826	0.757022	0.999653
ML12B_MOUSE	O14950	Myl12b	ENSMUSG00000034868	MYOSIN, LIGHT CHAIN 12B, REGULATORY [SOURCE:MGI SYMBOL;ACC:MGI:107494]	-	-	-	-	-	-	-0.724859	0.00686875	0.652048	-	-	-	-	-	-	0.174103	0.531036	0.908779	-	-	-	-	-	-	-0.102489	0.437234	0.999653
ITPA_MOUSE	Q9D892	Itpa	ENSMUSG00000074797	INOSINE TRIPHOSPHATASE (NUCLEOSIDE TRIPHOSPHATE PYROPHOSPHATASE) [SOURCE:MGI SYMBOL;ACC:MGI:96622]	-	-	-	-	-	-	-0.354177	0.014965	0.652048	-	-	-	-	-	-	-0.38288	0.0499486	0.615173	-	-	-	-	-	-	-0.025488	0.802075	0.999653
ODO2_MOUSE	Q9D2G2	Dlst	ENSMUSG00000004789	DIHYDROLIPOAMIDE S-SUCCINYLTRANSFERASE (E2 COMPONENT OF 2-OXO-GLUTARATE COMPLEX) [SOURCE:MGI SYMBOL;ACC:MGI:1926170]	-	-	-	-	-	-	-0.279913	0.0103818	0.652048	-	-	-	-	-	-	0.103791	0.403725	0.86456	-	-	-	-	-	-	-0.0389724	0.60993	0.999653
MAON_MOUSE	Q8BMF3	Me3	ENSMUSG00000030621	MALIC ENZYME 3, NADP(+)-DEPENDENT, MITOCHONDRIAL [SOURCE:MGI SYMBOL;ACC:MGI:1916679]	-	-	-	-	-	-	0.307197	0.0145966	0.652048	-	-	-	-	-	-	-0.167501	0.318848	0.833384	-	-	-	-	-	-	-0.110107	0.532122	0.999653

## Sheet: D2 strain
S6 Table. Overlap between statistically significant differentially expressed (P < 0.05 and |FC| ≥ 1.2) transcriptomic (data sets A and E) and proteomic (data set B) data. Data generated from mouse BNST following exposure to chronic social defeat stress. All non-significant results (P > 0.05 and |FC| < 1.2) are indicated by a hyphen ("-"). B6: C57BL/6NCrl; D2: DBA/2NCrl; FC: fold change.
Protein information (dataset B)		Gene information (dataset A)			Differentially expressed (DE) proteins (dataset B)									Differentially expressed (DE) genes (dataset A)
					Resilient versus Control			Susceptible versus Control			Susceptible vs Resilient			Resilient versus Control			Susceptible versus Control			Susceptible vs Resilient
UniProt name	UniProtKB ID	Gene name	Ensembl ID	Description	logFC	P	PFDR	logFC	P	PFDR	logFC	P	PFDR	logFC	P	PFDR	logFC	P	PFDR	logFC	P	PFDR
AAK1_MOUSE	Q3UHJ0	Aak1	ENSMUSG00000057230	AP2 ASSOCIATED KINASE 1 [SOURCE:MGI SYMBOL;ACC:MGI:1098687]	-0.856365	0.00449515	0.0392874	-	-	-	-	-	-	-0.0273547	0.843844	0.990621	-	-	-	-	-	-
ACLY_MOUSE	Q91V92	Acly	ENSMUSG00000020917	ATP CITRATE LYASE [SOURCE:MGI SYMBOL;ACC:MGI:103251]	-0.531949	0.0200721	0.10589	-	-	-	0.43094	0.00142817	0.0273978	-0.180972	0.308355	0.935049	-	-	-	0.0282368	0.872538	0.999876
ACTZ_MOUSE	P61162	Actr1a	ENSMUSG00000025228	ARP1 ACTIN-RELATED PROTEIN 1A, CENTRACTIN ALPHA [SOURCE:MGI SYMBOL;ACC:MGI:1858964]	-0.722219	<0.001	<0.001	-	-	-	-	-	-	-0.100149	0.567782	0.966478	-	-	-	-	-	-
ACTY_MOUSE	Q8R5C5	Actr1b	ENSMUSG00000037351	ARP1 ACTIN-RELATED PROTEIN 1B, CENTRACTIN BETA [SOURCE:MGI SYMBOL;ACC:MGI:1917446]	-0.766391	<0.001	0.00565973	-	-	-	-	-	-	-0.00303919	0.987117	0.999154	-	-	-	-	-	-
ADCY5_MOUSE	P84309	Adcy5	ENSMUSG00000022840	ADENYLATE CYCLASE 5 [SOURCE:MGI SYMBOL;ACC:MGI:99673]	-0.644015	<0.001	0.00990383	-	-	-	-	-	-	0.400698	0.267871	0.925303	-	-	-	-	-	-
AGAP2_MOUSE	Q3UHD9	Agap2	ENSMUSG00000025422	ARFGAP WITH GTPASE DOMAIN, ANKYRIN REPEAT AND PH DOMAIN 2 [SOURCE:MGI SYMBOL;ACC:MGI:3580016]	-0.690315	<0.001	<0.001	-	-	-	-	-	-	0.674417	0.143469	0.896027	-	-	-	-	-	-
AK1A1_MOUSE	Q9JII6	Akr1a1	ENSMUSG00000028692	ALDO-KETO REDUCTASE FAMILY 1, MEMBER A1 (ALDEHYDE REDUCTASE) [SOURCE:MGI SYMBOL;ACC:MGI:1929955]	-0.597068	<0.001	<0.001	-	-	-	-	-	-	-0.0848115	0.550819	0.963909	-	-	-	-	-	-
ALDH2_MOUSE	P47738	Aldh2	ENSMUSG00000029455	ALDEHYDE DEHYDROGENASE 2, MITOCHONDRIAL [SOURCE:MGI SYMBOL;ACC:MGI:99600]	-0.517087	0.000519115	0.0112608	-	-	-	-	-	-	0.128195	0.615877	0.96823	-	-	-	-	-	-
ANK2_MOUSE	Q8C8R3	Ank2	ENSMUSG00000032826	ANKYRIN 2, BRAIN [SOURCE:MGI SYMBOL;ACC:MGI:88025]	-0.410675	<0.001	0.00565973	-	-	-	-	-	-	-0.0717761	0.547817	0.963452	-	-	-	-	-	-
APOE_MOUSE	P08226	Apoe	ENSMUSG00000002985	APOLIPOPROTEIN E [SOURCE:MGI SYMBOL;ACC:MGI:88057]	-0.42944	0.00495835	0.0411252	-	-	-	-	-	-	0.113941	0.742512	0.982629	-	-	-	-	-	-
CAP2_MOUSE	Q9CYT6	Cap2	ENSMUSG00000021373	CAP, ADENYLATE CYCLASE-ASSOCIATED PROTEIN, 2 (YEAST) [SOURCE:MGI SYMBOL;ACC:MGI:1914502]	-0.27068	0.00201214	0.0271708	-	-	-	0.422341	<0.001	0.00853555	0.278951	0.206406	0.920079	-	-	-	-0.170194	0.436659	0.999876
ACBP_MOUSE	P31786	Dbi	ENSMUSG00000026385	DIAZEPAM BINDING INHIBITOR [SOURCE:MGI SYMBOL;ACC:MGI:94865]	-1.05317	<0.001	0.00181581	-	-	-	-	-	-	-0.122655	0.490213	0.957898	-	-	-	-	-	-
AINX_MOUSE	P46660	Ina	ENSMUSG00000034336	INTERNEXIN NEURONAL INTERMEDIATE FILAMENT PROTEIN, ALPHA [SOURCE:MGI SYMBOL;ACC:MGI:96568]	-0.655253	<0.001	0.0112608	-	-	-	0.52932	<0.001	0.00754761	-0.610503	0.00154953	0.716102	-	-	-	0.0986825	0.573773	0.999876
PROF1_MOUSE	P62962	Pfn1	ENSMUSG00000018293	PROFILIN 1 [SOURCE:MGI SYMBOL;ACC:MGI:97549]	-0.514251	0.0279788	0.1315	-	-	-	-	-	-	0.252043	0.620422	0.96823	-	-	-	-	-	-
WASF1_MOUSE	Q8R5H6	Wasf1	ENSMUSG00000019831	WAS PROTEIN FAMILY, MEMBER 1 [SOURCE:MGI SYMBOL;ACC:MGI:1890563]	0.446947	<0.001	0.0112608	-	-	-	-	-	-	0.459102	0.193817	0.915415	-	-	-	-	-	-
WDR1_MOUSE	O88342	Wdr1	ENSMUSG00000005103	WD REPEAT DOMAIN 1 [SOURCE:MGI SYMBOL;ACC:MGI:1337100]	0.675341	0.00073441	0.0138069	-	-	-	-	-	-	-0.163285	0.351763	0.938277	-	-	-	-	-	-
WDR7_MOUSE	Q920I9	Wdr7	ENSMUSG00000040560	WD REPEAT DOMAIN 7 [SOURCE:MGI SYMBOL;ACC:MGI:1860197]	0.747786	0.00304009	0.0342923	-	-	-	-	-	-	-0.0409357	0.704614	0.979548	-	-	-	-	-	-
1433B_MOUSE	Q9CQV8	Ywhab	ENSMUSG00000018326	TYROSINE 3-MONOOXYGENASE/TRYPTOPHAN 5-MONOOXYGENASE ACTIVATION PROTEIN, BETA POLYPEPTIDE [SOURCE:MGI SYMBOL;ACC:MGI:1891917]	-1.45505	<0.001	<0.001	-	-	-	-	-	-	-0.186864	0.228538	0.922966	-	-	-	-	-	-
ALDR_MOUSE	P45376	Akr1b1	ENSMUSG00000061758	ALDO-KETO REDUCTASE FAMILY 1, MEMBER B10 (ALDOSE REDUCTASE) [SOURCE:MGI SYMBOL;ACC:MGI:1915111]	-0.434604	<0.001	0.00190261	-	-	-	-	-	-	-0.786339	0.0140983	0.861916	-	-	-	-	-	-
ANK3_MOUSE	G5E8K5	Ank3	ENSMUSG00000069601	ANKYRIN 3, EPITHELIAL [SOURCE:MGI SYMBOL;ACC:MGI:88026]	-0.358385	0.0144769	0.097202	-	-	-	-	-	-	-0.0791173	0.632633	0.968501	-	-	-	-	-	-
ARF3_MOUSE	P61204	Arf3	ENSMUSG00000051853	ADP-RIBOSYLATION FACTOR 3 [SOURCE:MGI SYMBOL;ACC:MGI:99432]	-0.356645	0.00369766	0.0371148	-	-	-	-	-	-	0.3287	0.199431	0.916912	-	-	-	-	-	-
AMPL_MOUSE	Q9CPY7	Lap3	ENSMUSG00000039682	LEUCINE AMINOPEPTIDASE 3 [SOURCE:MGI SYMBOL;ACC:MGI:1914238]	-0.355898	0.00318006	0.0344914	-	-	-	-	-	-	-0.452442	0.0565123	0.867948	-	-	-	-	-	-
AP2A1_MOUSE	P17426	Ap2a1	ENSMUSG00000060279	ADAPTOR-RELATED PROTEIN COMPLEX 2, ALPHA 1 SUBUNIT [SOURCE:MGI SYMBOL;ACC:MGI:101921]	-0.346087	0.00171011	0.0271708	-	-	-	-	-	-	-0.0342094	0.911469	0.995204	-	-	-	-	-	-
ATCAY_MOUSE	Q8BHE3	Atcay	ENSMUSG00000034958	ATAXIA, CEREBELLAR, CAYMAN TYPE [SOURCE:MGI SYMBOL;ACC:MGI:2448730]	-0.332832	0.00558608	0.0425924	-	-	-	-	-	-	-0.00313301	0.988815	0.999556	-	-	-	-	-	-
ARPC2_MOUSE	Q9CVB6	Arpc2	ENSMUSG00000006304	ACTIN RELATED PROTEIN 2/3 COMPLEX, SUBUNIT 2 [SOURCE:MGI SYMBOL;ACC:MGI:1923959]	-0.32703	0.00130562	0.0230116	-	-	-	-	-	-	0.00596973	0.969772	0.998425	-	-	-	-	-	-
AT2B1_MOUSE	G5E829	Atp2b1	ENSMUSG00000019943	ATPASE, CA++ TRANSPORTING, PLASMA MEMBRANE 1 [SOURCE:MGI SYMBOL;ACC:MGI:104653]	-0.322954	0.00197705	0.0271708	-	-	-	-	-	-	-0.275167	0.222324	0.922893	-	-	-	-	-	-
AT5F1_MOUSE	Q9CQQ7	Atp5f1	ENSMUSG00000000563	ATP SYNTHASE, H+ TRANSPORTING, MITOCHONDRIAL F0 COMPLEX, SUBUNIT B1 [SOURCE:MGI SYMBOL;ACC:MGI:1100495]	-0.319741	0.00546388	0.0425924	-	-	-	-	-	-	-0.356495	0.0764993	0.874996	-	-	-	-	-	-
ATP5I_MOUSE	Q06185	Atp5k	ENSMUSG00000050856	ATP SYNTHASE, H+ TRANSPORTING, MITOCHONDRIAL F1F0 COMPLEX, SUBUNIT E [SOURCE:MGI SYMBOL;ACC:MGI:106636]	-0.296854	<0.001	0.0112608	-	-	-	-	-	-	-0.119253	0.756598	0.983544	-	-	-	-	-	-
APOO_MOUSE	Q78IK4	Apoo	ENSMUSG00000079508	APOLIPOPROTEIN O [SOURCE:MGI SYMBOL;ACC:MGI:1915566]	-0.292542	0.0445788	0.177059	-	-	-	-	-	-	-0.22089	0.509903	0.960267	-	-	-	-	-	-
ATPD_MOUSE	Q9D3D9	Atp5d	ENSMUSG00000003072	ATP SYNTHASE, H+ TRANSPORTING, MITOCHONDRIAL F1 COMPLEX, DELTA SUBUNIT [SOURCE:MGI SYMBOL;ACC:MGI:1913293]	-0.288307	0.00244321	0.0313176	-	-	-	-	-	-	0.0547646	0.907608	0.994852	-	-	-	-	-	-
AUXI_MOUSE	Q80TZ3	Dnajc6	ENSMUSG00000028528	DNAJ HEAT SHOCK PROTEIN FAMILY (HSP40) MEMBER C6 [SOURCE:MGI SYMBOL;ACC:MGI:1919935]	-0.281265	0.00409372	0.038481	-	-	-	-	-	-	-0.369437	0.0122581	0.838672	-	-	-	-	-	-
BASI_MOUSE	P18572	Bsg	ENSMUSG00000023175	BASIGIN [SOURCE:MGI SYMBOL;ACC:MGI:88208]	-0.279549	0.00188297	0.0271708	-	-	-	-	-	-	-0.0632645	0.752892	0.983544	-	-	-	-	-	-
BIN1_MOUSE	O08539	Bin1	ENSMUSG00000024381	BRIDGING INTEGRATOR 1 [SOURCE:MGI SYMBOL;ACC:MGI:108092]	-0.278833	0.026333	0.125863	-	-	-	-	-	-	-0.251166	0.32307	0.936623	-	-	-	-	-	-
CYC_MOUSE	P62897	Cycs	ENSMUSG00000063694	CYTOCHROME C, SOMATIC [SOURCE:MGI SYMBOL;ACC:MGI:88578]	-0.276247	0.00925605	0.0652552	-	-	-	-	-	-	-0.482986	0.0414009	0.864615	-	-	-	-	-	-
CAPZB_MOUSE	P47757	Capzb	ENSMUSG00000028745	CAPPING PROTEIN (ACTIN FILAMENT) MUSCLE Z-LINE, BETA [SOURCE:MGI SYMBOL;ACC:MGI:104652]	-0.270334	0.0159008	0.100724	-	-	-	-	-	-	-0.0077327	0.961997	0.998425	-	-	-	-	-	-
CAZA2_MOUSE	P47754	Capza2	ENSMUSG00000015733	CAPPING PROTEIN (ACTIN FILAMENT) MUSCLE Z-LINE, ALPHA 2 [SOURCE:MGI SYMBOL;ACC:MGI:106222]	-0.267642	0.0116883	0.0803927	-	-	-	-	-	-	-0.160881	0.47058	0.955376	-	-	-	-	-	-
BSN_MOUSE	O88737	Bsn	ENSMUSG00000032589	BASSOON [SOURCE:MGI SYMBOL;ACC:MGI:1277955]	-0.267149	0.0198042	0.10589	-	-	-	-	-	-	0.293905	0.464292	0.953933	-	-	-	-	-	-
VATE1_MOUSE	P50518	Atp6v1e1	ENSMUSG00000019210	ATPASE, H+ TRANSPORTING, LYSOSOMAL V1 SUBUNIT E1 [SOURCE:MGI SYMBOL;ACC:MGI:894326]	0.32696	0.00262329	0.0321638	-	-	-	-	-	-	-0.31138	0.0372099	0.864615	-	-	-	-	-	-
CD166_MOUSE	Q61490	Alcam	ENSMUSG00000022636	ACTIVATED LEUKOCYTE CELL ADHESION MOLECULE [SOURCE:MGI SYMBOL;ACC:MGI:1313266]	-	-	-	0.440175	0.037414	0.633845	0.417599	0.000994044	0.0244896	-	-	-	0.085373	0.717898	0.972716	-0.0794863	0.770726	0.999876
DCE2_MOUSE	P48320	Gad2	ENSMUSG00000026787	GLUTAMIC ACID DECARBOXYLASE 2 [SOURCE:MGI SYMBOL;ACC:MGI:95634]	-	-	-	0.467693	0.00436213	0.633845	-	-	-	-	-	-	-0.345164	0.0447228	0.75671	-	-	-
PC4L1_MOUSE	Q6W8Q3	Pcp4l1	ENSMUSG00000038370	PURKINJE CELL PROTEIN 4-LIKE 1 [SOURCE:MGI SYMBOL;ACC:MGI:1913675]	-	-	-	0.365445	0.0410184	0.633845	-	-	-	-	-	-	-0.374383	0.220026	0.879298	-	-	-
DHPR_MOUSE	Q8BVI4	Qdpr	ENSMUSG00000015806	QUINOID DIHYDROPTERIDINE REDUCTASE [SOURCE:MGI SYMBOL;ACC:MGI:97836]	-	-	-	-0.295476	0.0399409	0.633845	0.503487	0.000781573	0.0211806	-	-	-	-0.57384	0.0428868	0.755232	-0.0349998	0.912178	0.999876
MARE2_MOUSE	Q8R001	Mapre2	ENSMUSG00000024277	MICROTUBULE-ASSOCIATED PROTEIN, RP/EB FAMILY, MEMBER 2 [SOURCE:MGI SYMBOL;ACC:MGI:106271]	-	-	-	0.267531	0.0268864	0.633845	-	-	-	-	-	-	-0.0705647	0.533368	0.951965	-	-	-
SCAM1_MOUSE	Q8K021	Scamp1	ENSMUSG00000021687	SECRETORY CARRIER MEMBRANE PROTEIN 1 [SOURCE:MGI SYMBOL;ACC:MGI:1349480]	-	-	-	0.299333	0.0216703	0.633845	-	-	-	-	-	-	-0.0505924	0.752877	0.980383	-	-	-
VAMP2_MOUSE	P63044	Vamp2	ENSMUSG00000020894	VESICLE-ASSOCIATED MEMBRANE PROTEIN 2 [SOURCE:MGI SYMBOL;ACC:MGI:1313277]	-	-	-	0.306404	0.0103154	0.633845	-	-	-	-	-	-	-0.371819	0.196115	0.870163	-	-	-
ABLM2_MOUSE	Q8BL65	Ablim2	ENSMUSG00000029095	ACTIN-BINDING LIM PROTEIN 2 [SOURCE:MGI SYMBOL;ACC:MGI:2385758]	-	-	-	-	-	-	0.514883	<0.001	0.00460133	-	-	-	-	-	-	-0.13264	0.683161	0.999876
BCAS1_MOUSE	Q80YN3	Bcas1	ENSMUSG00000013523	BREAST CARCINOMA AMPLIFIED SEQUENCE 1 [SOURCE:MGI SYMBOL;ACC:MGI:1924210]	-	-	-	-	-	-	0.434888	0.00227065	0.0343809	-	-	-	-	-	-	-0.323886	0.390306	0.999876
C2C2L_MOUSE	Q80X80	C2cd2l	ENSMUSG00000032120	C2 CALCIUM-DEPENDENT DOMAIN CONTAINING 2-LIKE [SOURCE:MGI SYMBOL;ACC:MGI:1919014]	-	-	-	-	-	-	0.412989	0.00510002	0.062823	-	-	-	-	-	-	-0.349463	0.326225	0.999876
KCC2B_MOUSE	P28652	Camk2b	ENSMUSG00000057897	CALCIUM/CALMODULIN-DEPENDENT PROTEIN KINASE II, BETA [SOURCE:MGI SYMBOL;ACC:MGI:88257]	-	-	-	-	-	-	0.386583	0.0023137	0.0343809	-	-	-	-	-	-	-0.339669	0.285463	0.999876
LGUL_MOUSE	Q9CPU0	Glo1	ENSMUSG00000024026	GLYOXALASE 1 [SOURCE:MGI SYMBOL;ACC:MGI:95742]	-	-	-	-	-	-	0.31789	0.0131851	0.0916195	-	-	-	-	-	-	-0.175153	0.260211	0.999876
HNRPC_MOUSE	Q9Z204	Hnrnpc	ENSMUSG00000060373	HETEROGENEOUS NUCLEAR RIBONUCLEOPROTEIN C [SOURCE:MGI SYMBOL;ACC:MGI:107795]	-	-	-	-	-	-	0.409937	0.00887905	0.0814624	-	-	-	-	-	-	-0.00313318	0.979424	0.999885
ITPR1_MOUSE	P11881	Itpr1	ENSMUSG00000030102	INOSITOL 1,4,5-TRISPHOSPHATE RECEPTOR 1 [SOURCE:MGI SYMBOL;ACC:MGI:96623]	-	-	-	-	-	-	0.648272	0.00333965	0.0430974	-	-	-	-	-	-	0.00816886	0.968928	0.999876
NFH_MOUSE	P19246	Nefh	ENSMUSG00000020396	NEUROFILAMENT, HEAVY POLYPEPTIDE [SOURCE:MGI SYMBOL;ACC:MGI:97309]	-	-	-	-	-	-	0.376944	0.00272539	0.0369291	-	-	-	-	-	-	0.500625	0.318206	0.999876
NFM_MOUSE	P08553	Nefm	ENSMUSG00000022054	NEUROFILAMENT, MEDIUM POLYPEPTIDE [SOURCE:MGI SYMBOL;ACC:MGI:97314]	-	-	-	-	-	-	0.541826	<0.001	0.00528826	-	-	-	-	-	-	0.460252	0.237088	0.999876
PDIA1_MOUSE	P09103	P4hb	ENSMUSG00000025130	PROLYL 4-HYDROXYLASE, BETA POLYPEPTIDE [SOURCE:MGI SYMBOL;ACC:MGI:97464]	-	-	-	-	-	-	0.47833	0.00139445	0.0273978	-	-	-	-	-	-	0.0789029	0.582855	0.999876
PCP4_MOUSE	P63054	Pcp4	ENSMUSG00000090223	PURKINJE CELL PROTEIN 4 [SOURCE:MGI SYMBOL;ACC:MGI:97509]	-	-	-	-	-	-	1.22761	<0.001	0.00100854	-	-	-	-	-	-	-0.345027	0.440703	0.999876
PDE2A_MOUSE	Q922S4	Pde2a	ENSMUSG00000110195	PHOSPHODIESTERASE 2A, CGMP-STIMULATED [SOURCE:MGI SYMBOL;ACC:MGI:2446107]	-	-	-	-	-	-	0.371597	0.0192145	0.104142	-	-	-	-	-	-	-0.230827	0.610369	0.999876
MYPR_MOUSE	P60201	Plp1	ENSMUSG00000031425	PROTEOLIPID PROTEIN (MYELIN) 1 [SOURCE:MGI SYMBOL;ACC:MGI:97623]	-	-	-	-	-	-	0.405549	0.00178576	0.0302462	-	-	-	-	-	-	-0.282365	0.458391	0.999876
PPR1B_MOUSE	Q60829	Ppp1r1b	ENSMUSG00000061718	PROTEIN PHOSPHATASE 1, REGULATORY (INHIBITOR) SUBUNIT 1B [SOURCE:MGI SYMBOL;ACC:MGI:94860]	-	-	-	-	-	-	1.97202	<0.001	<0.001	-	-	-	-	-	-	-0.409859	0.466754	0.999876
PP1R7_MOUSE	Q3UM45	Ppp1r7	ENSMUSG00000026275	PROTEIN PHOSPHATASE 1, REGULATORY (INHIBITOR) SUBUNIT 7 [SOURCE:MGI SYMBOL;ACC:MGI:1913635]	-	-	-	-	-	-	0.467004	0.00151648	0.0273978	-	-	-	-	-	-	-0.190703	0.266288	0.999876
PP2BA_MOUSE	P63328	Ppp3ca	ENSMUSG00000028161	PROTEIN PHOSPHATASE 3, CATALYTIC SUBUNIT, ALPHA ISOFORM [SOURCE:MGI SYMBOL;ACC:MGI:107164]	-	-	-	-	-	-	0.585068	<0.001	0.00460133	-	-	-	-	-	-	-0.22946	0.42227	0.999876
PSA5_MOUSE	P28066	Psma5	ENSMUSG00000068749	PROTEASOME (PROSOME, MACROPAIN) SUBUNIT, ALPHA TYPE 5 [SOURCE:MGI SYMBOL;ACC:MGI:1347009]	-	-	-	-	-	-	0.404006	0.00560974	0.0660973	-	-	-	-	-	-	0.00312661	0.982922	0.999885
NSMA2_MOUSE	Q9JJY3	Smpd3	ENSMUSG00000031906	SPHINGOMYELIN PHOSPHODIESTERASE 3, NEUTRAL [SOURCE:MGI SYMBOL;ACC:MGI:1927578]	-	-	-	-	-	-	0.939492	<0.001	0.000600137	-	-	-	-	-	-	0.0200741	0.958295	0.999876
SRSF1_MOUSE	Q07955	Srsf1	ENSMUSG00000018379	SERINE/ARGININE-RICH SPLICING FACTOR 1 [SOURCE:MGI SYMBOL;ACC:MGI:98283]	-	-	-	-	-	-	0.381835	0.0417147	0.14882	-	-	-	-	-	-	0.0944495	0.645823	0.999876
VISL1_MOUSE	P62760	Vsnl1	ENSMUSG00000054459	VISININ-LIKE 1 [SOURCE:MGI SYMBOL;ACC:MGI:1349453]	-	-	-	-	-	-	-0.426682	0.0086074	0.0814624	-	-	-	-	-	-	-0.174474	0.700478	0.999876
HECAM_MOUSE	Q640R3	Hepacam	ENSMUSG00000046240	HEPATOCYTE CELL ADHESION MOLECULE [SOURCE:MGI SYMBOL;ACC:MGI:1920177]	-	-	-	-	-	-	0.268413	0.0153613	0.104073	-	-	-	-	-	-	-0.238925	0.372047	0.999876
NDUA4_MOUSE	Q62425	Ndufa4	ENSMUSG00000029632	NADH DEHYDROGENASE (UBIQUINONE) 1 ALPHA SUBCOMPLEX, 4 [SOURCE:MGI SYMBOL;ACC:MGI:107686]	-	-	-	-	-	-	0.275389	0.0128011	0.0912923	-	-	-	-	-	-	-0.407408	0.15088	0.999876
TPIS_MOUSE	P17751	Tpi1	ENSMUSG00000023456	TRIOSEPHOSPHATE ISOMERASE 1 [SOURCE:MGI SYMBOL;ACC:MGI:98797]	-	-	-	-	-	-	0.277499	0.00931857	0.0814624	-	-	-	-	-	-	-0.201464	0.379785	0.999876
TMOD2_MOUSE	Q9JKK7	Tmod2	ENSMUSG00000032186	TROPOMODULIN 2 [SOURCE:MGI SYMBOL;ACC:MGI:1355335]	-	-	-	-	-	-	0.281049	0.0258226	0.118203	-	-	-	-	-	-	-0.10827	0.457295	0.999876
CX7A2_MOUSE	P48771	Cox7a2	ENSMUSG00000032330	CYTOCHROME C OXIDASE SUBUNIT VIIA 2 [SOURCE:MGI SYMBOL;ACC:MGI:1316715]	-	-	-	-	-	-	0.281988	0.0236777	0.116666	-	-	-	-	-	-	-0.350072	0.124298	0.999876
OXR1_MOUSE	Q4KMM3	Oxr1	ENSMUSG00000022307	OXIDATION RESISTANCE 1 [SOURCE:MGI SYMBOL;ACC:MGI:2179326]	-	-	-	-	-	-	0.284259	0.0102286	0.0815283	-	-	-	-	-	-	0.277736	0.254522	0.999876
TPM1_MOUSE	P04692	Tpm1	ENSMUSG00000032366	TROPOMYOSIN 1, ALPHA [SOURCE:MGI SYMBOL;ACC:MGI:98809]	-	-	-	-	-	-	0.2857	0.0181361	0.104142	-	-	-	-	-	-	-0.0496643	0.760748	0.999876
SUCA_MOUSE	Q9WUM5	Suclg1	ENSMUSG00000052738	SUCCINATE-COA LIGASE, GDP-FORMING, ALPHA SUBUNIT [SOURCE:MGI SYMBOL;ACC:MGI:1927234]	-	-	-	-	-	-	0.289197	0.0115906	0.0892451	-	-	-	-	-	-	-0.0152451	0.910371	0.999876
K1045_MOUSE	Q80TL4	Phf24	ENSMUSG00000036062	PHD FINGER PROTEIN 24 [SOURCE:MGI SYMBOL;ACC:MGI:2140712]	-	-	-	-	-	-	0.290909	0.0191574	0.104142	-	-	-	-	-	-	0.0156239	0.919612	0.999876
IMPA1_MOUSE	O55023	Impa1	ENSMUSG00000027531	INOSITOL (MYO)-1(OR 4)-MONOPHOSPHATASE 1 [SOURCE:MGI SYMBOL;ACC:MGI:1933158]	-	-	-	-	-	-	0.292678	0.0376514	0.143039	-	-	-	-	-	-	0.084462	0.553526	0.999876
MATR3_MOUSE	Q8K310	Matr3	ENSMUSG00000037236	MATRIN 3 [SOURCE:MGI SYMBOL;ACC:MGI:1298379]	-	-	-	-	-	-	0.29548	0.0278623	0.120753	-	-	-	-	-	-	-0.0625897	0.782344	0.999876
ROA2_MOUSE	O88569	Hnrnpa2b1	ENSMUSG00000004980	HETEROGENEOUS NUCLEAR RIBONUCLEOPROTEIN A2/B1 [SOURCE:MGI SYMBOL;ACC:MGI:104819]	-	-	-	-	-	-	0.297203	0.0185155	0.104142	-	-	-	-	-	-	-0.351105	0.132389	0.999876
NCAN_MOUSE	P55066	Ncan	ENSMUSG00000002341	NEUROCAN [SOURCE:MGI SYMBOL;ACC:MGI:104694]	-	-	-	-	-	-	0.301259	0.0278739	0.120753	-	-	-	-	-	-	-0.199145	0.446276	0.999876
PRDX1_MOUSE	P35700	Prdx1	ENSMUSG00000028691	PEROXIREDOXIN 1 [SOURCE:MGI SYMBOL;ACC:MGI:99523]	-	-	-	-	-	-	0.301501	0.0261705	0.118203	-	-	-	-	-	-	-0.0935821	0.667026	0.999876
NIPS1_MOUSE	O55125	Nipsnap1	ENSMUSG00000034285	NIPSNAP HOMOLOG 1 (C, ELEGANS) [SOURCE:MGI SYMBOL;ACC:MGI:1278344]	-	-	-	-	-	-	0.303761	0.0280718	0.120753	-	-	-	-	-	-	0.00208336	0.986286	0.999885
PHB_MOUSE	P67778	Phb	ENSMUSG00000038845	PROHIBITIN [SOURCE:MGI SYMBOL;ACC:MGI:97572]	-	-	-	-	-	-	0.311497	0.00840732	0.0814624	-	-	-	-	-	-	0.0438769	0.848974	0.999876
THIL_MOUSE	Q8QZT1	Acat1	ENSMUSG00000032047	ACETYL-COENZYME A ACETYLTRANSFERASE 1 [SOURCE:MGI SYMBOL;ACC:MGI:87870]	-	-	-	-	-	-	0.311934	0.0168168	0.104142	-	-	-	-	-	-	-0.0579205	0.625914	0.999876
NDKB_MOUSE	Q01768	Nme2	ENSMUSG00000020857	NME/NM23 NUCLEOSIDE DIPHOSPHATE KINASE 2 [SOURCE:MGI SYMBOL;ACC:MGI:97356]	-	-	-	-	-	-	0.317472	0.00669051	0.075547	-	-	-	-	-	-	0.256961	0.69756	0.999876
COX5B_MOUSE	P19536	Cox5b	ENSMUSG00000061518	CYTOCHROME C OXIDASE SUBUNIT VB [SOURCE:MGI SYMBOL;ACC:MGI:88475]	-	-	-	-	-	-	0.319135	0.0162353	0.104142	-	-	-	-	-	-	-0.347528	0.21451	0.999876
ENOG_MOUSE	P17183	Eno2	ENSMUSG00000004267	ENOLASE 2, GAMMA NEURONAL [SOURCE:MGI SYMBOL;ACC:MGI:95394]	-	-	-	-	-	-	0.320041	0.0127975	0.0912923	-	-	-	-	-	-	-0.138165	0.429038	0.999876
DEMA_MOUSE	Q9WV69	Dmtn	ENSMUSG00000022099	DEMATIN ACTIN BINDING PROTEIN [SOURCE:MGI SYMBOL;ACC:MGI:99670]	-	-	-	-	-	-	0.32047	0.0340737	0.13782	-	-	-	-	-	-	-0.27996	0.489636	0.999876
NDUA7_MOUSE	Q9Z1P6	Ndufa7	ENSMUSG00000041881	NADH DEHYDROGENASE (UBIQUINONE) 1 ALPHA SUBCOMPLEX, 7 (B14,5A) [SOURCE:MGI SYMBOL;ACC:MGI:1913666]	-	-	-	-	-	-	0.334926	0.0202091	0.107386	-	-	-	-	-	-	-0.431404	0.153204	0.999876
SHAN3_MOUSE	Q4ACU6	Shank3	ENSMUSG00000022623	SH3/ANKYRIN DOMAIN GENE 3 [SOURCE:MGI SYMBOL;ACC:MGI:1930016]	-	-	-	-	-	-	0.336652	0.021903	0.111995	-	-	-	-	-	-	-0.0783775	0.856547	0.999876
PSA_MOUSE	Q11011	Npepps	ENSMUSG00000001441	AMINOPEPTIDASE PUROMYCIN SENSITIVE [SOURCE:MGI SYMBOL;ACC:MGI:1101358]	-	-	-	-	-	-	0.343011	0.00809646	0.0814624	-	-	-	-	-	-	0.153356	0.242211	0.999876
NDKA_MOUSE	P15532	Nme1	ENSMUSG00000037601	NME/NM23 NUCLEOSIDE DIPHOSPHATE KINASE 1 [SOURCE:MGI SYMBOL;ACC:MGI:97355]	-	-	-	-	-	-	0.347628	0.00995117	0.0815283	-	-	-	-	-	-	-0.075388	0.816823	0.999876
PP2BB_MOUSE	P48453	Ppp3cb	ENSMUSG00000021816	PROTEIN PHOSPHATASE 3, CATALYTIC SUBUNIT, BETA ISOFORM [SOURCE:MGI SYMBOL;ACC:MGI:107163]	-	-	-	-	-	-	0.349899	0.0118554	0.0892451	-	-	-	-	-	-	0.129812	0.553956	0.999876
EFTU_MOUSE	Q8BFR5	Tufm	ENSMUSG00000073838	TU TRANSLATION ELONGATION FACTOR, MITOCHONDRIAL [SOURCE:MGI SYMBOL;ACC:MGI:1923686]	-	-	-	-	-	-	0.352533	0.00241047	0.0343809	-	-	-	-	-	-	0.0145668	0.960333	0.999876
CPLX1_MOUSE	P63040	Cplx1	ENSMUSG00000033615	COMPLEXIN 1 [SOURCE:MGI SYMBOL;ACC:MGI:104727]	-	-	-	-	-	-	0.355151	0.00998102	0.0815283	-	-	-	-	-	-	0.0177421	0.954015	0.999876
SFXN3_MOUSE	Q91V61	Sfxn3	ENSMUSG00000025212	SIDEROFLEXIN 3 [SOURCE:MGI SYMBOL;ACC:MGI:2137679]	-	-	-	-	-	-	0.373589	0.00150132	0.0273978	-	-	-	-	-	-	-0.0899164	0.632876	0.999876
TOM70_MOUSE	Q9CZW5	Tomm70a	ENSMUSG00000022752	TRANSLOCASE OF OUTER MITOCHONDRIAL MEMBRANE 70 HOMOLOG A (YEAST) [SOURCE:MGI SYMBOL;ACC:MGI:106295]	-	-	-	-	-	-	0.480581	0.000687017	0.0206869	-	-	-	-	-	-	0.0143646	0.955866	0.999876

## Sheet: B6 control vs. D2 control
S6 Table. Overlap between statistically significant differentially expressed (P < 0.05 and |FC| ≥ 1.2) transcriptomic (data sets A and E) and proteomic (data set B) data. Data generated from mouse BNST following exposure to chronic social defeat stress. All non-significant results (P > 0.05 and |FC| < 1.2) are indicated by a hyphen ("-"). B6: C57BL/6NCrl; D2: DBA/2NCrl; FC: fold change.
Protein information (dataset B)		Gene information (dataset A)			Differentially expressed (DE) proteins (dataset B)			Differentially expressed (DE) genes (dataset A)
					B6 Control versus D2 Control			B6 Control versus D2 Control
UniProt name	UniProtKB ID	Gene name	Ensembl ID	Description	logFC	P	PFDR	logFC	P	PFDR
ADCY5_MOUSE	P84309	Adcy5	ENSMUSG00000022840	ADENYLATE CYCLASE 5 [SOURCE:MGI SYMBOL;ACC:MGI:99673]	0.561998	<0.001	0.00159166	0.74076	0.0230201	0.253393
CD166_MOUSE	Q61490	Alcam	ENSMUSG00000022636	ACTIVATED LEUKOCYTE CELL ADHESION MOLECULE [SOURCE:MGI SYMBOL;ACC:MGI:1313266]	0.625163	<0.001	0.00278178	0.145499	0.538746	0.805491
BCAS1_MOUSE	Q80YN3	Bcas1	ENSMUSG00000013523	BREAST CARCINOMA AMPLIFIED SEQUENCE 1 [SOURCE:MGI SYMBOL;ACC:MGI:1924210]	-0.362512	0.00389688	0.0499817	-0.506101	0.127224	0.488198
CALB2_MOUSE	Q08331	Calb2	ENSMUSG00000003657	CALBINDIN 2 [SOURCE:MGI SYMBOL;ACC:MGI:101914]	0.736598	0.00117764	0.0204356	0.786319	0.266797	0.629835
CAMKV_MOUSE	Q3UHL1	Camkv	ENSMUSG00000032936	CAM KINASE-LIKE VESICLE-ASSOCIATED [SOURCE:MGI SYMBOL;ACC:MGI:2384296]	0.413396	0.000551978	0.0125257	0.711657	0.032426	0.293358
MIC25_MOUSE	Q91VN4	Chchd6	ENSMUSG00000030086	COILED-COIL-HELIX-COILED-COIL-HELIX DOMAIN CONTAINING 6 [SOURCE:MGI SYMBOL;ACC:MGI:1913348]	0.90267	<0.001	0.00760484	0.467363	0.0352691	0.304779
KCRU_MOUSE	P30275	Ckmt1	ENSMUSG00000000308	CREATINE KINASE, MITOCHONDRIAL 1, UBIQUITOUS [SOURCE:MGI SYMBOL;ACC:MGI:99441]	-0.415815	0.000598485	0.0126109	-0.181372	0.397255	0.726827
CLAP2_MOUSE	Q8BRT1	Clasp2	ENSMUSG00000033392	CLIP ASSOCIATING PROTEIN 2 [SOURCE:MGI SYMBOL;ACC:MGI:1923749]	0.395328	0.0144409	0.134902	-0.221914	0.285874	0.645263
ACBP_MOUSE	P31786	Dbi	ENSMUSG00000026385	DIAZEPAM BINDING INHIBITOR [SOURCE:MGI SYMBOL;ACC:MGI:94865]	0.338544	0.0120651	0.130709	-0.0188945	0.901765	0.967677
DPP6_MOUSE	Q9Z218	Dpp6	ENSMUSG00000061576	DIPEPTIDYLPEPTIDASE 6 [SOURCE:MGI SYMBOL;ACC:MGI:94921]	0.451949	<0.001	0.00760484	0.165609	0.179769	0.5474
LGUL_MOUSE	Q9CPU0	Glo1	ENSMUSG00000024026	GLYOXALASE 1 [SOURCE:MGI SYMBOL;ACC:MGI:95742]	-0.855515	<0.001	<0.001	-0.925629	<0.001	<0.001
NFH_MOUSE	P19246	Nefh	ENSMUSG00000020396	NEUROFILAMENT, HEAVY POLYPEPTIDE [SOURCE:MGI SYMBOL;ACC:MGI:97309]	-0.63215	<0.001	<0.001	-0.652742	0.135635	0.496998
NFM_MOUSE	P08553	Nefm	ENSMUSG00000022054	NEUROFILAMENT, MEDIUM POLYPEPTIDE [SOURCE:MGI SYMBOL;ACC:MGI:97314]	-0.426035	<0.001	0.0108536	-0.38315	0.255389	0.618875
PC4L1_MOUSE	Q6W8Q3	Pcp4l1	ENSMUSG00000038370	PURKINJE CELL PROTEIN 4-LIKE 1 [SOURCE:MGI SYMBOL;ACC:MGI:1913675]	0.383868	0.00724049	0.0854378	0.348335	0.253044	0.616335
PCSK1_MOUSE	Q9QXV0	Pcsk1n	ENSMUSG00000039278	PROPROTEIN CONVERTASE SUBTILISIN/KEXIN TYPE 1 INHIBITOR [SOURCE:MGI SYMBOL;ACC:MGI:1353431]	0.452935	0.0214403	0.170943	0.627117	0.25082	0.614739
PDE1B_MOUSE	Q01065	Pde1b	ENSMUSG00000022489	PHOSPHODIESTERASE 1B, CA2+-CALMODULIN DEPENDENT [SOURCE:MGI SYMBOL;ACC:MGI:97523]	0.561884	0.00282637	0.043883	0.676357	0.0190939	0.231119
PDE2A_MOUSE	Q922S4	Pde2a	ENSMUSG00000110195	PHOSPHODIESTERASE 2A, CGMP-STIMULATED [SOURCE:MGI SYMBOL;ACC:MGI:2446107]	0.523054	<0.001	0.00760484	1.12635	0.00850566	0.153074
MYPR_MOUSE	P60201	Plp1	ENSMUSG00000031425	PROTEOLIPID PROTEIN (MYELIN) 1 [SOURCE:MGI SYMBOL;ACC:MGI:97623]	-0.280011	0.0307796	0.21619	-0.746162	0.0315123	0.28958
PPR1B_MOUSE	Q60829	Ppp1r1b	ENSMUSG00000061718	PROTEIN PHOSPHATASE 1, REGULATORY (INHIBITOR) SUBUNIT 1B [SOURCE:MGI SYMBOL;ACC:MGI:94860]	0.394975	0.00117673	0.0204356	0.988227	0.0493246	0.350352
SCG2_MOUSE	Q03517	Scg2	ENSMUSG00000050711	SECRETOGRANIN II [SOURCE:MGI SYMBOL;ACC:MGI:103033]	0.718956	<0.001	0.00366327	-0.0350835	0.853186	0.950245
NSMA2_MOUSE	Q9JJY3	Smpd3	ENSMUSG00000031906	SPHINGOMYELIN PHOSPHODIESTERASE 3, NEUTRAL [SOURCE:MGI SYMBOL;ACC:MGI:1927578]	0.571427	0.0124669	0.130709	0.886843	0.0122734	0.187725
TY3H_MOUSE	P24529	Th	ENSMUSG00000000214	TYROSINE HYDROXYLASE [SOURCE:MGI SYMBOL;ACC:MGI:98735]	0.637055	0.00142982	0.0234332	0.732717	0.0500385	0.35175
GRAP1_MOUSE	Q8VD04	Gripap1	ENSMUSG00000031153	GRIP1 ASSOCIATED PROTEIN 1 [SOURCE:MGI SYMBOL;ACC:MGI:1859616]	-0.36921	0.00330053	0.0443343	0.224615	0.302283	0.657148
DHE3_MOUSE	P26443	Glud1	ENSMUSG00000021794	GLUTAMATE DEHYDROGENASE 1 [SOURCE:MGI SYMBOL;ACC:MGI:95753]	-0.308163	0.0167963	0.145732	-0.463393	0.00263499	0.0751658
KCY_MOUSE	Q9DBP5	Cmpk1	ENSMUSG00000028719	CYTIDINE MONOPHOSPHATE (UMP-CMP) KINASE 1 [SOURCE:MGI SYMBOL;ACC:MGI:1913838]	-0.30101	0.0146334	0.134902	-0.663978	0.00706224	0.138053
GFAP_MOUSE	P03995	Gfap	ENSMUSG00000020932	GLIAL FIBRILLARY ACIDIC PROTEIN [SOURCE:MGI SYMBOL;ACC:MGI:95697]	-0.29563	0.0154945	0.138511	-0.375677	0.440025	0.752597
CLD11_MOUSE	Q60771	Cldn11	ENSMUSG00000037625	CLAUDIN 11 [SOURCE:MGI SYMBOL;ACC:MGI:106925]	-0.29326	0.00662742	0.081462	-0.529712	0.0560412	0.368192
VIME_MOUSE	P20152	Vim	ENSMUSG00000026728	VIMENTIN [SOURCE:MGI SYMBOL;ACC:MGI:98932]	-0.273786	0.0138083	0.134902	-0.346925	0.0872065	0.42893
CPLX1_MOUSE	P63040	Cplx1	ENSMUSG00000033615	COMPLEXIN 1 [SOURCE:MGI SYMBOL;ACC:MGI:104727]	-0.264116	0.0319668	0.219307	-0.229669	0.392803	0.724816
UB2V1_MOUSE	Q9CZY3	Ube2v1	ENSMUSG00000078923	UBIQUITIN-CONJUGATING ENZYME E2 VARIANT 1 [SOURCE:MGI SYMBOL;ACC:MGI:1913839]	0.290692	0.0270823	0.194861	-0.0120191	0.97242	0.991039
ARC1A_MOUSE	Q9R0Q6	Arpc1a	ENSMUSG00000029621	ACTIN RELATED PROTEIN 2/3 COMPLEX, SUBUNIT 1A [SOURCE:MGI SYMBOL;ACC:MGI:1928896]	0.306267	0.0235376	0.182726	0.121306	0.296178	0.652934
NEB2_MOUSE	Q6R891	Ppp1r9b	ENSMUSG00000038976	PROTEIN PHOSPHATASE 1, REGULATORY SUBUNIT 9B [SOURCE:MGI SYMBOL;ACC:MGI:2387581]	0.316518	0.0128493	0.130709	0.482259	0.0957687	0.441031
ARF3_MOUSE	P61204	Arf3	ENSMUSG00000051853	ADP-RIBOSYLATION FACTOR 3 [SOURCE:MGI SYMBOL;ACC:MGI:99432]	0.323533	0.00883234	0.100213	0.525831	0.0220984	0.24859
EHD3_MOUSE	Q9QXY6	Ehd3	ENSMUSG00000024065	EH-DOMAIN CONTAINING 3 [SOURCE:MGI SYMBOL;ACC:MGI:1928900]	0.337863	0.00330628	0.0443343	0.368178	0.021801	0.247308
NECA2_MOUSE	Q91ZP9	Necab2	ENSMUSG00000031837	N-TERMINAL EF-HAND CALCIUM BINDING PROTEIN 2 [SOURCE:MGI SYMBOL;ACC:MGI:2152211]	0.363756	0.00323229	0.0443343	0.688932	0.00837298	0.152233
HBA_MOUSE	P01942	Hba-a1	ENSMUSG00000069919	HEMOGLOBIN ALPHA, ADULT CHAIN 1 [SOURCE:MGI SYMBOL;ACC:MGI:96015]	0.692575	<0.001	0.00278033	0.00390396	0.993421	0.997861
HBA_MOUSE	P01942	Hba-a2	ENSMUSG00000069917	HEMOGLOBIN ALPHA, ADULT CHAIN 2 [SOURCE:MGI SYMBOL;ACC:MGI:96016]	0.692575	<0.001	0.00278033	6.12673	<0.001	<0.001
